# Supplementary material for: Targeting PirAvp and PirBvp Toxins of Vibrio parahaemolyticus with Oilseed Peptides: An In Silico Approach
Source: MDPI journal article supplement (doi:10.3390/antibiotics10101211), 2021-10-05
Supplement: s1 [file s1]

### Supplementary Materials

**Table S1:** Number of residues in the two PirB<sup>vp</sup>-binding regions of PirA<sup>vp</sup> protein that are involved in interactions with 18 chosen oilseed peptides.

| Source             | Peptide                          | PirB <sup>vp</sup> -Binding Region of PirA <sup>vp</sup> Protein |                                                | Total Number of Residues |
|--------------------|----------------------------------|------------------------------------------------------------------|------------------------------------------------|--------------------------|
|                    |                                  | 15-<br>WTVEPNGGVTE<br>VDSKHTPIIPEVG<br>RS-40                     | 52-<br>TIQYQWGAPF<br>MAGGWKVAK<br>SHVVQRDET-79 |                          |
| Rape               | LTFVVHGHALMGK                    | 0                                                                | 6                                              | 6                        |
|                    | ISYVVQGMGISGR                    | 0                                                                | 9                                              | 9                        |
|                    | QSLGVPPQLGNACNLDNLDVL<br>QPTETIK | 0                                                                | 8                                              | 8                        |
|                    | TNANAMVSTLAGR                    | 1                                                                | 6                                              | 7                        |
|                    | TNANAQINTLAGR                    | 0                                                                | 8                                              | 8                        |
|                    | NLPNVCNMK                        | 4                                                                | 0                                              | 4                        |
|                    | CSGVSFVR                         | 0                                                                | 6                                              | 6                        |
| Sesame             | ISTINSQTLPILSQLR                 | 0                                                                | 10                                             | 10                       |
|                    | GLQVISPLQR                       | 7                                                                | 0                                              | 7                        |
|                    | GHIITVAR                         | 0                                                                | 8                                              | 8                        |
|                    | GLIVMAR                          | 4                                                                | 0                                              | 4                        |
| Hemp               | QQQIVTVPQNHAVVK                  | 0                                                                | 6                                              | 6                        |
|                    | PQFLVGASSILR                     | 0                                                                | 6                                              | 6                        |
|                    | LGNLTSYQR                        | 0                                                                | 6                                              | 6                        |
|                    | VQVVNHMGQK                       | 0                                                                | 7                                              | 7                        |
|                    | ESVILPTSAASPPVK                  | 1                                                                | 8                                              | 9                        |
| Sunflower          | GHIVNVGQDLQIVR                   | 0                                                                | 6                                              | 6                        |
|                    | VIQNLPNQCDLEVQQCTTCTG            | 1                                                                | 5                                              | 6                        |
| PirB <sup>vp</sup> | YNRVGRLKL                        | 0                                                                | 6                                              | 6                        |
|                    | WADNDSYNNANQD                    | 1                                                                | 6                                              | 7                        |
|                    | FVVGENSEGKPSVRLQL                | 10                                                               | 0                                              | 10                       |
|                    | YELFHPDEF                        | 1                                                                | 7                                              | 8                        |
|                    | DEIPQPLKPNM                      | 0                                                                | 4                                              | 4                        |
|                    | MLADQEGSDKVAA                    | 0                                                                | 10                                             | 10                       |

Interactions between six PirB<sup>vp</sup> regions (322-YNRVGRLKL-330, 214-WADNDSYNNANQD-226, 386-FVVGENSEGKPSVRLQL-401, 426-YELFHPDEF-434, 290-DEIPQPLKPNM-300 and 409-MLADQEGSDKVAA-421) that were previously reported to bind to PirA<sup>vp</sup> to form a toxic complex were also analyzed for comparison.

**Table S2:** Number of residues in the six PirA<sup>vp</sup>-binding regions of PirB<sup>vp</sup> protein that are involved in interactions with six chosen oilseed peptides.

| Source             | Peptide          | PirA <sup>vp</sup> -Binding Region of PirB <sup>vp</sup> Protein |                             |                           |                                      |                                   |                       | Total Number of Residues |
|--------------------|------------------|------------------------------------------------------------------|-----------------------------|---------------------------|--------------------------------------|-----------------------------------|-----------------------|--------------------------|
|                    |                  | 214-WAD<br>NDSY<br>NNAN<br>QD-226                                | 290-DEIPQ<br>PLKP<br>NM-300 | 322-YNRV<br>GRLK<br>L-330 | 386-FVVG<br>ENSG<br>KPSV<br>RLQL-401 | 409-MLAD<br>QEGS<br>DKVA<br>A-421 | 426-YELFH<br>PDEF-434 |                          |
| Rape               | ISYVVQGMGISGR    | 0                                                                | 0                           | 0                         | 1                                    | 0                                 | 2                     | 3                        |
|                    | LTFVVHGHALMGK    | 0                                                                | 0                           | 0                         | 0                                    | 0                                 | 3                     | 3                        |
|                    | QSLGVPPQLGNACNL  | 0                                                                | 0                           | 0                         | 3                                    | 0                                 | 1                     | 4                        |
|                    | DNLDVLQPTETIK    |                                                                  |                             |                           |                                      |                                   |                       |                          |
| Sesame             | ISTINSQTLPILSQLR | 0                                                                | 0                           | 0                         | 2                                    | 0                                 | 0                     | 2                        |
| Hemp               | PQFLVGASSILR     | 0                                                                | 0                           | 0                         | 0                                    | 0                                 | 2                     | 2                        |
|                    | VQVVNHMGQK       | 0                                                                | 0                           | 0                         | 0                                    | 0                                 | 2                     | 2                        |
| PirA <sup>vp</sup> | TIQYQWGAPFMAGG   | 0                                                                | 0                           | 0                         | 3                                    | 0                                 | 0                     | 3                        |
|                    | WKVAKSHVVQRDET   |                                                                  |                             |                           |                                      |                                   |                       |                          |
|                    | WTVEPNGGVTEVDSK  | 0                                                                | 0                           | 0                         | 4                                    | 0                                 | 1                     | 5                        |
|                    | HTPIIPEVGRS      |                                                                  |                             |                           |                                      |                                   |                       |                          |

Interactions between two PirA<sup>vp</sup> regions (52-TIQYQWGAPFMAGGWKVAKSHVVQRDET-79 and 15-WTVEPNGGVTEVDSKHTPIIPEVGRS-40) that were previously reported to bind to PirB<sup>vp</sup> to form a toxic complex were also analyzed for comparison.
